# Supplementary material
Source: PubMed Central journal article supplement (PMC2605662)
Supplement: NIHMS68803-supplement-2.pdf [file NIHMS68803-supplement-2.pdf]

**Supplementary Table 1. Genes that are significantly differentially regulated in response to Rag DSBs that are independent of Atm**

| <b>Relative fold change* for each sample / average of the RAG2<sup>-/-</sup> samples</b> |                      |            |            |            |               |               |               |             |             |
|------------------------------------------------------------------------------------------|----------------------|------------|------------|------------|---------------|---------------|---------------|-------------|-------------|
| <b>Affymetrix ID</b>                                                                     | <b>Sequence Name</b> | <b>A.1</b> | <b>A.2</b> | <b>A.3</b> | <b>A.3ΔN1</b> | <b>A.3ΔN2</b> | <b>A.3ΔN3</b> | <b>AA.1</b> | <b>AA.2</b> |
| 1445884_at                                                                               | 1110007A13Rik        | -2.41      | -3.06      | -2.11      | -1.57         | -1.52         | -1.67         | -3.50       | -3.62       |
| 1440848_at                                                                               | 1110028C15Rik        | 3.21       | 4.61       | 3.57       | 4.97          | 4.38          | 5.56          | 4.30        | 4.53        |
| 1458128_at                                                                               | 1110028C15Rik        | 5.61       | 5.89       | 6.23       | 7.60          | 8.74          | 8.38          | 6.33        | 7.08        |
| 1455219_at                                                                               | 1110030E23Rik        | -3.38      | -9.63      | -3.07      | -2.27         | -2.43         | -2.30         | -9.31       | -10.25      |
| 1452418_at                                                                               | 1200016E24Rik        | 3.16       | 3.54       | 12.70      | 4.47          | 5.18          | 6.28          | 5.10        | 3.11        |
| 1427820_at                                                                               | 1427820_at           | -4.30      | -12.62     | -5.91      | -5.86         | -3.83         | -3.98         | -6.59       | -6.99       |
| 1435981_at                                                                               | 1435981_at           | -25.82     | -8.09      | -5.59      | -27.23        | -22.49        | -50.72        | -26.99      | -37.82      |
| 1436449_at                                                                               | 1436449_at           | 61.73      | 34.03      | 4.22       | 7.05          | 6.44          | 15.05         | 20.49       | 11.62       |
| 1441172_at                                                                               | 1441172_at           | -15.63     | -22.56     | -14.78     | -33.19        | -11.44        | -18.68        | -24.77      | -17.80      |
| 1441971_at                                                                               | 1441971_at           | 4.61       | 10.44      | 2.75       | 4.09          | 4.93          | 5.46          | 2.26        | 4.55        |
| 1441974_at                                                                               | 1441974_at           | -5.23      | -6.26      | -7.00      | -27.21        | -32.43        | -31.61        | -6.50       | -6.53       |
| 1444416_at                                                                               | 1444416_at           | -12.28     | -10.32     | -6.17      | -4.67         | -3.92         | -4.47         | -8.13       | -13.11      |
| 1444937_at                                                                               | 1444937_at           | -2.20      | -4.46      | -3.27      | -2.01         | -1.61         | -2.31         | -2.00       | -2.35       |
| 1445411_at                                                                               | 1445411_at           | -2.85      | -3.03      | -2.52      | -3.21         | -5.23         | -3.07         | -2.90       | -2.67       |
| 1445641_at                                                                               | 1445641_at           | 3.19       | 3.16       | 3.13       | 3.78          | 5.26          | 5.13          | 5.42        | 6.47        |
| 1447124_at                                                                               | 1447124_at           | -3.02      | -3.11      | -3.15      | -2.97         | -3.00         | -3.36         | -2.85       | -2.79       |
| 1456426_at                                                                               | 1456426_at           | -2.59      | -10.97     | -3.61      | -1.24         | -1.77         | -3.48         | -3.40       | -2.68       |
| 1457769_at                                                                               | 1457769_at           | 2.76       | 4.55       | 3.56       | 2.40          | 2.93          | 2.98          | 4.60        | 6.20        |
| 1457805_at                                                                               | 1457805_at           | -2.05      | -12.19     | -13.79     | -10.40        | -14.82        | -14.48        | -2.99       | -2.60       |
| 1458535_at                                                                               | 1458535_at           | 11.25      | 7.62       | 7.67       | 7.75          | 6.15          | 9.60          | 9.63        | 9.65        |
| 1459260_at                                                                               | 1459260_at           | 4.35       | 6.31       | 5.09       | 3.44          | 5.40          | 5.76          | 2.94        | 4.76        |
| 1433695_at                                                                               | 1500041B16Rik        | 14.76      | 6.18       | 2.57       | 2.44          | 2.32          | 2.75          | 8.72        | 11.61       |
| 1456720_at                                                                               | 1500041B16Rik        | 14.13      | 7.12       | 2.16       | 2.07          | 3.05          | 2.29          | 9.39        | 12.43       |
| 1459253_at                                                                               | 1700023H06Rik        | 20.53      | 11.94      | 8.15       | 7.11          | 8.26          | 7.12          | 39.38       | 33.06       |
| 1419327_at                                                                               | 2210010A19Rik        | -28.13     | -15.11     | -19.61     | -21.63        | -25.80        | -20.40        | -18.52      | -19.92      |
| 1434175_s_at                                                                             | 2210010N04Rik        | -3.64      | -2.97      | -2.90      | -1.07         | -1.18         | -1.59         | -2.01       | -3.72       |
| 1436679_at                                                                               | 2210010N04Rik        | -4.12      | -4.00      | -3.11      | 1.11          | -1.34         | -1.80         | -2.09       | -3.74       |
| 1428039_at                                                                               | 2310040A13Rik        | -6.54      | -6.36      | -3.19      | -2.54         | -2.72         | -6.84         | -6.64       | -4.55       |
| 1428256_at                                                                               | 2310047H23Rik        | 5.13       | 3.45       | 7.35       | 6.99          | 7.68          | 7.69          | 5.37        | 2.80        |

|              |               |        |        |        |        |        |        |        |        |
|--------------|---------------|--------|--------|--------|--------|--------|--------|--------|--------|
| 1429509_at   | 2600001B17Rik | 2.69   | 3.92   | 3.52   | 2.59   | 3.58   | 2.74   | 3.86   | 3.45   |
| 1455657_at   | 2610207I05Rik | 3.09   | 2.66   | 2.53   | 4.02   | 3.18   | 3.69   | 4.07   | 3.35   |
| 1431141_at   | 2610507I01Rik | -4.71  | -10.59 | -10.64 | -4.42  | -7.24  | -10.19 | -11.15 | -9.06  |
| 1453749_at   | 2610507I01Rik | -3.05  | -6.19  | -6.79  | -5.85  | -6.39  | -7.25  | -10.94 | -11.83 |
| 1451799_at   | 2610528H13Rik | 3.68   | 3.32   | 2.93   | 2.56   | 3.86   | 3.13   | 3.03   | 2.03   |
| 1438575_a_at | 2900056M20Rik | -10.60 | -6.11  | -4.95  | -5.39  | -4.95  | -5.38  | -4.36  | -5.66  |
| 1438576_x_at | 2900056M20Rik | -6.51  | -3.57  | -3.16  | -4.70  | -3.45  | -3.60  | -3.23  | -3.71  |
| 1431478_at   | 3110035G12Rik | -2.80  | -2.23  | -3.99  | -4.34  | -1.79  | -4.23  | -3.39  | -3.38  |
| 1458318_at   | 3110047M12Rik | -2.46  | -4.56  | -3.49  | -3.65  | -1.62  | -3.99  | -2.25  | -2.32  |
| 1436388_a_at | 3830406C13Rik | 3.81   | 5.46   | 4.36   | 3.16   | 3.42   | 3.61   | 3.74   | 4.41   |
| 1419730_at   | 4631427C17Rik | 10.99  | 10.46  | 10.92  | 13.64  | 30.15  | 21.48  | 6.06   | 6.99   |
| 1452703_at   | 4631427C17Rik | 6.02   | 5.34   | 5.30   | 6.87   | 7.91   | 8.76   | 3.49   | 2.40   |
| 1454353_at   | 4833420D23Rik | -4.24  | -4.86  | -3.32  | -3.35  | -3.59  | -4.97  | -5.08  | -4.78  |
| 1420329_at   | 4930455C21Rik | 4.06   | 2.36   | 2.10   | 2.33   | 2.20   | 2.15   | 2.08   | 2.65   |
| 1435827_at   | 4933404O12Rik | -5.03  | -3.21  | -5.35  | -4.36  | -3.15  | -2.57  | -5.15  | -4.81  |
| 1439327_at   | 4933426F18Rik | -2.46  | -4.23  | -5.08  | -4.51  | -2.80  | -1.80  | -2.67  | -3.76  |
| 1433177_at   | 4933427C19Rik | -6.37  | -3.49  | -2.98  | -4.49  | -2.39  | -3.55  | -2.74  | -2.59  |
| 1441050_at   | 5730526G10Rik | -2.39  | -12.28 | -36.93 | -7.87  | -21.36 | -18.49 | -22.70 | -22.75 |
| 1431266_at   | 5830433G22Rik | -4.41  | -7.39  | -3.36  | -2.40  | -2.55  | -1.85  | -3.21  | -4.02  |
| 1441071_at   | 5830474E16Rik | -37.54 | -15.40 | -11.57 | -26.72 | -17.09 | -9.61  | -8.72  | -18.38 |
| 1432880_at   | 6820402A03Rik | -12.83 | -16.55 | -13.88 | -18.72 | -8.51  | -12.70 | -10.32 | -18.28 |
| 1426535_at   | 9630046K23Rik | 4.37   | 3.63   | 3.88   | 1.96   | 2.04   | 1.82   | 2.59   | 2.29   |
| 1421840_at   | Abca1         | -69.19 | -52.00 | -50.35 | -19.90 | -36.36 | -35.88 | -49.99 | -62.45 |
| 1441945_s_at | Abhd14a       | -2.52  | -3.74  | -3.98  | -1.83  | -2.54  | -3.62  | -4.09  | -4.32  |
| 1441975_at   | Acpp          | 6.69   | 3.22   | 8.14   | 8.00   | 5.40   | 9.16   | 14.32  | 11.08  |
| 1436678_at   | AI844814      | 9.23   | 4.65   | 9.05   | 4.95   | 7.14   | 8.42   | 5.18   | 4.53   |
| 1434729_at   | AK129302      | 7.91   | 8.60   | 8.53   | 6.69   | 5.54   | 6.59   | 11.48  | 12.10  |
| 1450455_s_at | Akr1c12       | 28.32  | 36.37  | 63.65  | 31.75  | 36.05  | 35.23  | 28.99  | 26.53  |
| 1418672_at   | Akr1c13       | 27.82  | 33.26  | 52.70  | 30.67  | 32.89  | 35.68  | 26.09  | 25.88  |
| 1435193_at   | Angptl6       | 8.01   | 4.18   | 6.19   | 3.01   | 4.01   | 3.74   | 2.48   | 2.11   |
| 1444128_at   | Arhgap26      | -9.79  | -6.64  | -8.07  | -14.96 | -16.63 | -7.60  | -16.80 | -17.72 |
| 1423061_at   | Arvcf         | -5.56  | -5.68  | -5.55  | -3.84  | -7.06  | -4.06  | -6.64  | -5.02  |
| 1421466_at   | Asb10         | -7.17  | -17.82 | -8.91  | -6.30  | -4.59  | -2.52  | -18.07 | -10.60 |
| 1426015_s_at | Asph          | -4.21  | -3.77  | -2.38  | -2.33  | -2.05  | -2.81  | -2.12  | -2.11  |
| 1445014_at   | AU019157      | 13.03  | 13.09  | 32.71  | 18.27  | 32.39  | 25.20  | 32.60  | 17.52  |

|              |               |        |        |        |        |        |        |        |        |
|--------------|---------------|--------|--------|--------|--------|--------|--------|--------|--------|
| 1435034_at   | AW060207      | -2.83  | -3.33  | -4.05  | -3.84  | -3.80  | -4.01  | -3.11  | -3.10  |
| 1454984_at   | AW061234      | -17.55 | -32.91 | -6.40  | -2.68  | -4.60  | -3.26  | -3.38  | -3.77  |
| 1440171_x_at | BB026409      | -3.89  | -4.93  | -2.33  | -2.08  | -2.29  | -1.94  | -6.48  | -3.52  |
| 1440218_at   | BC040758      | 15.01  | 9.28   | 92.37  | 47.37  | 45.03  | 44.55  | 14.95  | 5.59   |
| 1429048_at   | Bloc1s2       | 6.68   | 7.06   | 5.94   | 4.93   | 5.05   | 5.51   | 7.26   | 4.69   |
| 1436194_at   | C330008K14Rik | 5.21   | 3.38   | 2.97   | 1.71   | 1.45   | 1.61   | 4.62   | 3.55   |
| 1459603_at   | C330008K14Rik | 13.59  | 2.84   | 8.69   | 3.64   | 5.10   | 3.65   | 3.57   | 3.02   |
| 1443584_at   | C430010P07Rik | 2.35   | 3.11   | 2.71   | 2.75   | 3.41   | 3.57   | 2.27   | 3.14   |
| 1445510_at   | C79601        | 3.47   | 6.95   | 5.55   | 3.76   | 7.84   | 13.34  | 2.11   | 2.86   |
| 1444401_at   | C80913        | 17.34  | 14.01  | 27.00  | 27.06  | 31.65  | 28.03  | 28.70  | 23.73  |
| 1422710_a_at | Cacna1h       | -18.26 | -11.70 | -18.54 | -16.35 | -18.07 | -17.74 | -18.77 | -19.17 |
| 1417420_at   | Ccnd1         | 3.95   | 3.69   | 2.33   | 1.90   | 1.90   | 3.26   | 7.65   | 4.32   |
| 1430895_at   | Ccni          | -2.58  | -3.22  | -3.36  | -2.37  | -2.51  | -1.92  | -3.34  | -4.83  |
| 1424727_at   | Ccr5          | 2.76   | 25.67  | 35.60  | 41.72  | 48.56  | 35.80  | 10.83  | 3.95   |
| 1426120_a_at | Cd244         | 2.52   | 3.08   | 2.57   | 6.09   | 7.75   | 5.40   | 2.80   | 2.42   |
| 1449991_at   | Cd244         | 3.19   | 3.09   | 2.14   | 6.48   | 6.93   | 5.38   | 2.76   | 2.51   |
| 1443087_at   | Cdc23         | 2.58   | 3.81   | 2.76   | 2.09   | 2.67   | 2.52   | 3.26   | 2.77   |
| 1435231_at   | Coq4          | 15.99  | 9.53   | 8.71   | 22.45  | 16.98  | 19.46  | 8.41   | 10.75  |
| 1418476_at   | Crlf1         | -13.70 | -12.99 | -4.33  | 3.50   | 2.38   | 4.07   | -14.72 | -7.11  |
| 1425286_at   | Crygn         | 8.19   | 4.62   | 5.94   | 1.98   | 3.41   | 3.43   | 2.13   | 2.63   |
| 1418989_at   | Ctse          | 48.68  | 49.81  | 44.20  | 59.44  | 61.35  | 61.46  | 75.69  | 56.84  |
| 1446972_at   | D15Wsu126e    | -2.20  | -3.58  | -5.11  | -4.43  | -13.83 | -21.14 | -3.09  | -7.41  |
| 1450868_at   | D8Ertd354e    | 3.29   | 4.69   | 2.70   | 4.28   | 5.62   | 4.11   | 5.00   | 5.03   |
| 1419130_at   | Deadc1        | 5.30   | 9.84   | 4.73   | 5.50   | 5.11   | 5.70   | 6.97   | 12.84  |
| 1448892_at   | Dock7         | 71.11  | 25.10  | 17.37  | 53.47  | 51.81  | 51.56  | 17.22  | 2.29   |
| 1416600_a_at | Dscr1         | 6.18   | 7.76   | 3.36   | 1.79   | -1.10  | 1.47   | 2.73   | 5.88   |
| 1434472_at   | Dusp3         | -2.78  | -3.74  | -4.42  | -1.09  | -1.63  | -1.77  | -3.18  | -3.12  |
| 1421213_at   | Edaradd       | 8.51   | 7.08   | 3.01   | 2.40   | 2.58   | 4.83   | 4.57   | 11.31  |
| 1433133_at   | Edaradd       | 7.01   | 3.97   | 2.56   | 2.49   | 2.95   | 3.20   | 3.31   | 9.18   |
| 1437800_at   | Edaradd       | 4.92   | 4.00   | 2.05   | 1.58   | 2.11   | 3.21   | 2.73   | 6.81   |
| 1444335_at   | Edem2         | -3.09  | -3.43  | -2.76  | -2.94  | -2.20  | -2.48  | -2.56  | -2.11  |
| 1417235_at   | Ehd3          | 48.01  | 69.85  | 16.63  | 10.96  | 8.88   | 13.81  | 45.21  | 57.81  |
| 1417236_at   | Ehd3          | 6.01   | 9.20   | 3.32   | 2.11   | 2.67   | 2.35   | 6.12   | 6.56   |
| 1420491_at   | Eif2s1        | -6.38  | -4.56  | -3.27  | -5.79  | -4.38  | -5.99  | -4.92  | -4.43  |
| 1417403_at   | Elov16        | 3.27   | 3.99   | 2.89   | 4.51   | 5.29   | 5.94   | 4.86   | 6.62   |

|              |         |        |        |        |        |        |        |        |        |
|--------------|---------|--------|--------|--------|--------|--------|--------|--------|--------|
| 1417404_at   | Elov16  | 3.38   | 3.85   | 3.41   | 4.69   | 5.05   | 5.81   | 5.46   | 5.65   |
| 1442656_at   | Elov16  | 3.73   | 5.64   | 4.26   | 5.30   | 7.67   | 8.98   | 9.86   | 10.33  |
| 1445062_at   | Elov16  | 2.38   | 3.03   | 2.78   | 3.58   | 4.84   | 4.75   | 4.47   | 5.72   |
| 1440640_at   | Fancc   | -4.35  | -12.63 | -5.64  | -6.60  | -3.17  | -14.36 | -5.02  | -8.87  |
| 1443621_at   | Fbxo39  | 6.14   | 8.97   | 6.72   | 13.56  | 10.30  | 8.54   | 13.64  | 14.09  |
| 1460434_at   | Fundc2  | -3.38  | -2.94  | -5.41  | -7.73  | -5.12  | -3.24  | -2.50  | -2.15  |
| 1426704_at   | Gak     | 3.98   | 2.75   | 2.66   | 2.39   | 2.64   | 2.53   | 2.99   | 3.40   |
| 1455599_at   | Gfod1   | -3.03  | -4.15  | -2.50  | -1.66  | -2.13  | -1.74  | -3.02  | -2.89  |
| 1437522_x_at | Gh      | 3.60   | 5.21   | 2.91   | 1.07   | -1.26  | -1.12  | 2.27   | 2.55   |
| 1456595_x_at | Gh      | 4.44   | 5.75   | 4.18   | 2.38   | 2.10   | 1.14   | 2.02   | 2.15   |
| 1460613_x_at | Gh      | 4.63   | 7.58   | 5.10   | 1.11   | 1.52   | 1.34   | 2.26   | 2.22   |
| 1449220_at   | Gimap3  | -5.59  | -11.18 | -5.41  | -4.24  | -5.84  | -11.03 | -3.78  | -8.75  |
| 1456335_at   | Gm106   | 3.42   | 3.64   | 4.24   | 3.70   | 3.30   | 3.34   | 7.03   | 4.37   |
| 1423689_a_at | Gpsm1   | -4.07  | -3.83  | -2.56  | -1.87  | -1.81  | -2.63  | -5.21  | -3.12  |
| 1425614_x_at | H2-D1   | -29.62 | -27.44 | -30.12 | -45.44 | -45.06 | -47.98 | -28.72 | -35.76 |
| 1427651_x_at | H2-D1   | -27.04 | -28.14 | -24.49 | -38.40 | -45.62 | -47.80 | -32.28 | -31.68 |
| 1451593_at   | H2-D1   | -8.99  | -7.98  | -8.64  | -13.73 | -12.51 | -10.20 | -11.05 | -11.87 |
| 1452544_x_at | H2-D1   | -30.73 | -25.18 | -29.04 | -73.64 | -48.87 | -55.77 | -37.83 | -38.23 |
| 1422892_s_at | H2-Ea   | -53.88 | -51.32 | -52.91 | -47.29 | -54.62 | -53.50 | -54.71 | -56.75 |
| 1450582_at   | H2-Q5   | -3.53  | -2.18  | -3.34  | -3.08  | -4.83  | -3.57  | -3.25  | -3.97  |
| 1440145_at   | H60     | 2.31   | 3.64   | 3.38   | 2.57   | 2.24   | 2.41   | 4.08   | 5.71   |
| 1448631_a_at | Hipk2   | -5.41  | -3.07  | -2.56  | -1.58  | -1.69  | -6.63  | -3.11  | -2.23  |
| 1424032_at   | Hvcn1   | -13.98 | -4.79  | -3.93  | -3.12  | -4.90  | -5.03  | -11.22 | -28.32 |
| 1417793_at   | Iigp2   | -2.84  | -4.59  | -2.66  | -2.37  | -3.84  | -4.55  | -2.56  | -2.69  |
| 1425454_a_at | Il12a   | 4.73   | 4.03   | 5.25   | 1.54   | 1.54   | 1.78   | 2.05   | 2.13   |
| 1426214_at   | Imp4    | -6.64  | -2.21  | -3.73  | -3.60  | -3.95  | -6.56  | -4.96  | -2.39  |
| 1430002_at   | Iqcf1   | 4.34   | 5.66   | 6.22   | 4.88   | 3.54   | 5.78   | 5.32   | 4.94   |
| 1425050_at   | Isoc1   | 2.63   | 3.11   | 2.88   | 4.02   | 3.93   | 4.20   | 2.06   | 3.15   |
| 1433815_at   | Jakmip1 | -3.84  | -5.99  | -6.24  | -3.68  | -2.63  | -3.34  | -2.07  | -4.69  |
| 1428837_at   | Klhl14  | 6.89   | 3.10   | 5.03   | 2.35   | 2.17   | 2.85   | 3.87   | 5.41   |
| 1428091_at   | Klhl7   | 3.35   | 3.24   | 6.17   | 6.07   | 6.52   | 6.69   | 5.00   | 4.39   |
| 1452660_s_at | Klhl7   | 3.06   | 2.91   | 3.90   | 3.63   | 4.07   | 4.07   | 2.96   | 2.70   |
| 1460245_at   | Klrd1   | -2.97  | -55.02 | -3.01  | 2.13   | 2.87   | 3.11   | -52.56 | -40.67 |
| 1435472_at   | Kremen1 | -3.16  | -5.29  | -3.32  | -2.84  | -2.74  | -2.79  | -2.50  | -11.17 |
| 1445252_at   | Kremen1 | -3.35  | -3.39  | -2.27  | -2.92  | -2.13  | -1.87  | -3.23  | -3.41  |

|              |           |        |        |        |        |        |        |        |        |
|--------------|-----------|--------|--------|--------|--------|--------|--------|--------|--------|
| 1440435_at   | Ky        | 8.27   | 22.82  | 4.77   | 7.01   | 3.85   | 4.24   | 7.90   | 19.99  |
| 1427011_a_at | Lancl1    | -2.91  | -2.65  | -2.55  | -2.88  | -2.92  | -3.10  | -4.28  | -2.92  |
| 1439651_at   | Lmo4      | -4.31  | -3.40  | -8.76  | -6.58  | -7.12  | -12.58 | -3.89  | -9.07  |
| 1439065_x_at | LOC434637 | 12.28  | 11.30  | 9.98   | 9.93   | 11.13  | 18.58  | 2.19   | 10.50  |
| 1437854_at   | Lrrc18    | 3.70   | 4.17   | 8.39   | 4.33   | 6.45   | 5.17   | 3.18   | 2.15   |
| 1456060_at   | Maf       | 5.10   | 8.98   | 2.38   | 1.10   | 1.22   | -1.81  | 2.82   | 4.04   |
| 1418936_at   | Maff      | 2.82   | 4.75   | 3.27   | 4.17   | 2.49   | 2.48   | 2.39   | 2.10   |
| 1446565_at   | Man1b     | -16.02 | -2.01  | -5.99  | -7.80  | -11.19 | -10.29 | -2.85  | -4.94  |
| 1454158_at   | Mpp7      | 5.77   | 6.22   | 2.71   | 2.85   | 2.54   | 3.32   | 3.22   | 5.17   |
| 1430771_a_at | Msh5      | -8.33  | -9.55  | -4.89  | -3.92  | -2.90  | -2.52  | -3.79  | -6.16  |
| 1417706_at   | Naglu     | -2.51  | -2.62  | -2.73  | -1.15  | -1.53  | -2.49  | -2.34  | -2.91  |
| 1455556_at   | Notch2    | 7.48   | 3.23   | 8.01   | 5.34   | 4.20   | 2.19   | 3.61   | 2.28   |
| 1426155_a_at | Osr2      | -3.64  | -34.67 | -6.33  | -16.45 | -33.64 | -38.65 | -12.55 | -28.76 |
| 1425521_at   | Paip1     | 2.44   | 4.08   | 4.31   | 3.72   | 4.74   | 4.30   | 2.08   | 2.21   |
| 1441955_s_at | Paip1     | 3.28   | 5.71   | 5.01   | 5.75   | 7.31   | 6.46   | 3.89   | 3.67   |
| 1433658_x_at | Pcbp4     | -2.28  | -6.21  | -2.83  | -3.92  | -2.67  | -3.60  | -3.11  | -4.76  |
| 1443618_at   | Pdzd2     | -3.97  | -2.35  | -11.64 | -10.91 | -12.07 | -5.14  | -5.95  | -7.21  |
| 1439167_at   | Pecr      | -2.61  | -2.52  | -2.42  | -1.90  | -2.02  | -3.12  | -2.70  | -2.44  |
| 1452179_at   | Phf17     | 5.87   | 4.47   | 2.91   | 1.79   | 2.44   | 1.46   | 10.93  | 2.34   |
| 1433462_a_at | Pi4k2a    | -2.54  | -5.03  | -3.38  | -1.83  | -2.53  | -2.49  | -6.63  | -7.49  |
| 1428556_at   | Pigy      | -2.15  | -5.54  | -5.06  | -4.28  | -9.67  | -4.59  | -2.69  | -3.40  |
| 1429831_at   | Pik3ap1   | 6.47   | 3.97   | 5.04   | 4.14   | 3.79   | 5.15   | 4.28   | 3.23   |
| 1439197_at   | Pik4cb    | 7.56   | 4.92   | 6.19   | 3.92   | 5.80   | 4.38   | 6.11   | 5.56   |
| 1426448_at   | Pja1      | 2.15   | 8.28   | 23.51  | 4.24   | 1.63   | 2.39   | 14.26  | 10.45  |
| 1456047_at   | Pla2g4b   | 5.34   | 5.06   | 4.05   | 2.32   | 3.99   | 4.48   | 2.97   | 4.85   |
| 1443141_at   | Ppt1      | -2.37  | -5.35  | -2.31  | -2.08  | -2.18  | -1.71  | -16.98 | -5.41  |
| 1430148_at   | Rab19     | -42.55 | -12.07 | -42.08 | -39.04 | -43.62 | -42.35 | -38.22 | -25.65 |
| 1416527_at   | Rab32     | 5.94   | 10.21  | 3.42   | 3.75   | 5.63   | 5.84   | 6.53   | 14.44  |
| 1457178_at   | Rabgap1l  | -6.70  | -7.49  | -6.02  | -33.19 | -37.63 | -35.98 | -4.80  | -7.80  |
| 1439851_at   | Rabl5     | -7.75  | -9.80  | -4.76  | -1.82  | -1.81  | -2.33  | -18.88 | -21.58 |
| 1438030_at   | Rasgrp3   | -3.72  | -4.49  | -5.24  | -7.41  | -8.41  | -5.76  | -4.21  | -5.94  |
| 1444454_at   | Rb1       | 4.61   | 4.93   | 3.11   | 2.83   | 2.83   | 3.28   | 2.62   | 3.40   |
| 1423700_at   | Rfc3      | -2.15  | -2.41  | -2.86  | -2.84  | -3.01  | -2.53  | -2.88  | -2.38  |
| 1432538_a_at | Rfc3      | -2.13  | -2.26  | -2.74  | -2.54  | -2.42  | -2.74  | -2.89  | -2.32  |
| 1420398_at   | Rgs18     | -63.32 | -43.97 | -2.96  | -8.25  | -7.13  | -2.49  | -40.63 | -68.33 |

|              |            |         |         |        |         |         |         |        |         |
|--------------|------------|---------|---------|--------|---------|---------|---------|--------|---------|
| 1449856_at   | Rgs18      | -26.27  | -35.15  | -2.73  | -5.90   | -5.64   | -3.16   | -11.69 | -33.20  |
| 1460670_at   | Riok3      | -5.96   | -6.87   | -8.29  | -11.62  | -10.37  | -9.81   | -5.51  | -6.15   |
| 1447101_at   | Rnf122     | -2.37   | -4.65   | -2.85  | -2.39   | -3.22   | -5.51   | -4.42  | -3.49   |
| 1454857_at   | Rnf122     | -2.17   | -3.09   | -3.48  | -2.99   | -7.00   | -1.71   | -5.79  | -3.13   |
| 1423515_at   | Scn8a      | -20.17  | -8.98   | -12.98 | -6.98   | -13.84  | -20.22  | -2.62  | -11.13  |
| 1458693_at   | Scn8a      | -18.50  | -20.28  | -20.31 | -10.57  | -20.98  | -19.72  | -4.09  | -13.34  |
| 1439882_at   | Sec23ip    | 3.90    | 6.87    | 3.63   | 4.34    | 4.23    | 4.45    | 6.63   | 7.39    |
| 1419667_at   | Sgcb       | 6.27    | 4.34    | 5.67   | 6.31    | 4.57    | 5.32    | 3.48   | 4.14    |
| 1419668_at   | Sgcb       | 5.15    | 3.40    | 4.83   | 3.91    | 4.51    | 5.05    | 3.57   | 4.16    |
| 1421271_at   | Sh3md2     | 4.22    | 2.75    | 4.21   | 1.53    | 1.60    | 2.43    | 2.86   | 2.54    |
| 1442402_at   | Sh3rf1     | 2.67    | 3.01    | 3.69   | 2.28    | 1.54    | 1.90    | 2.23   | 2.34    |
| 1445178_at   | Sh3rf1     | 2.33    | 3.87    | 5.05   | -1.06   | 2.00    | 2.25    | 2.66   | 2.28    |
| 1455149_at   | Sh3rf1     | 3.30    | 3.73    | 4.77   | 1.38    | 1.62    | 2.62    | 2.97   | 3.14    |
| 1417584_at   | Slc11a2    | -3.57   | -7.44   | -9.37  | -2.76   | -9.00   | -3.67   | -6.43  | -4.53   |
| 1452078_a_at | Slc11a2    | -2.81   | -3.02   | -4.14  | -2.27   | -2.81   | -3.25   | -2.69  | -2.89   |
| 1417600_at   | Slc15a2    | -100.00 | -100.00 | -96.31 | -100.00 | -100.00 | -100.00 | -2.01  | -100.00 |
| 1438824_at   | Slc20a1    | 3.71    | 8.67    | 7.06   | 1.56    | 1.58    | 1.48    | 2.07   | 2.56    |
| 1426634_at   | Slc5a9     | 5.03    | 20.70   | 6.31   | 12.88   | 14.96   | 15.04   | 9.57   | 55.42   |
| 1439494_at   | Slc5a9     | 3.99    | 20.35   | 6.52   | 8.02    | 12.35   | 12.26   | 8.28   | 47.55   |
| 1448377_at   | Slpi       | -11.13  | -7.66   | -11.50 | -1.77   | -1.82   | -1.28   | -2.49  | -2.95   |
| 1428396_at   | Smurf1     | -5.49   | -7.74   | -5.67  | -1.96   | -2.61   | -2.12   | -8.74  | -2.35   |
| 1435603_at   | Sned1      | 3.36    | 2.30    | 5.35   | 4.56    | 5.36    | 4.88    | 3.18   | 4.19    |
| 1459764_x_at | Snx10      | -2.25   | -2.75   | -2.12  | -4.41   | -2.82   | -2.32   | -5.08  | -3.99   |
| 1438543_at   | Spata13    | -19.91  | -41.61  | -43.00 | -20.97  | -29.01  | -43.88  | -12.70 | -46.07  |
| 1417616_at   | St6galnac2 | 6.73    | 12.37   | 10.21  | 11.33   | 13.51   | 12.55   | 3.10   | 9.17    |
| 1427345_a_at | Sult1a1    | -6.06   | -4.69   | -3.01  | -2.22   | -1.77   | -2.83   | -7.58  | -7.70   |
| 1431044_at   | Thoc1      | 2.47    | 2.12    | 5.56   | 3.06    | 3.99    | 3.77    | 4.48   | 2.66    |
| 1446625_at   | Tmem100    | -9.51   | -23.45  | -14.67 | -31.55  | -45.16  | -35.83  | -6.91  | -12.54  |
| 1449533_at   | Tmem100    | -11.46  | -44.20  | -11.93 | -62.37  | -100.00 | -78.54  | -4.62  | -25.52  |
| 1449969_at   | Tmod4      | 8.71    | 3.31    | 7.59   | 7.44    | 8.42    | 6.65    | 6.27   | 8.95    |
| 1425546_a_at | Trf        | -67.44  | -21.13  | -66.57 | -25.23  | -16.30  | -19.72  | -69.49 | -60.07  |
| 1437432_a_at | Trim12     | -2.01   | -2.07   | -80.71 | -83.79  | -100.00 | -100.00 | -2.39  | -2.17   |
| 1424568_at   | Tspan2     | -4.63   | -2.52   | -2.32  | -11.14  | -17.47  | -9.39   | -3.75  | -47.67  |
| 1432417_a_at | Tspan2     | -5.47   | -2.15   | -2.24  | -7.14   | -19.04  | -11.77  | -2.89  | -21.28  |
| 1454673_at   | Wasf2      | 2.56    | 2.01    | 2.52   | 3.17    | 2.97    | 2.96    | 2.23   | 2.08    |

|            |        |       |        |        |       |       |       |       |       |
|------------|--------|-------|--------|--------|-------|-------|-------|-------|-------|
| 1446905_at | Waspip | -6.14 | -14.40 | -21.85 | -6.21 | -6.49 | -6.48 | -3.83 | -3.61 |
| 1440400_at | X83325 | 2.44  | 2.54   | 5.64   | 2.43  | 3.26  | 3.80  | 2.25  | 2.93  |
| 1456770_at | Zfp14  | 3.15  | 3.22   | 2.88   | -1.99 | 2.15  | 2.17  | 2.46  | 2.07  |
| 1431747_at | Zw10   | -2.34 | -2.03  | -2.96  | -2.73 | -1.93 | -1.52 | -2.46 | -2.83 |

---

\*Fold change from experinents using the Affymetrix Mouse Genome 430, v2.0 GeneChip® arrays

**Supplementary Table 2. Genes that are significantly differentially regulated in response to Rag DSBs that are Atm dependent, but independent of NFκB activation**

|               |               | Relative fold change* for each sample/average of the RAG2 <sup>-/-</sup> samples |        |        |         |         |        |       |        |
|---------------|---------------|----------------------------------------------------------------------------------|--------|--------|---------|---------|--------|-------|--------|
| Affymetrix ID | Sequence Name | A.1                                                                              | A.2    | A.3    | A.3ΔN1  | A.3ΔN2  | A.3ΔN3 | AA.1  | AA.2   |
| 1431213_a_at  | 1300007C21Rik | 22.30                                                                            | 15.21  | 24.81  | 22.07   | 18.69   | 17.92  | -2.98 | -15.35 |
| 1455869_at    | 1300007C21Rik | 100.00                                                                           | 100.00 | 100.00 | 100.00  | 100.00  | 100.00 | 4.15  | 2.30   |
| 1436296_x_at  | 1436296_x_at  | -2.77                                                                            | -5.00  | -3.44  | -4.58   | -6.69   | -4.16  | -1.25 | -2.12  |
| 1438435_at    | 1438435_at    | 7.93                                                                             | 9.22   | 25.37  | 37.34   | 42.47   | 53.12  | -2.27 | -2.10  |
| 1440305_at    | 1440305_at    | -7.84                                                                            | -2.64  | -2.62  | -3.16   | -3.50   | -3.02  | 2.23  | 2.35   |
| 1443455_at    | 1443455_at    | -3.41                                                                            | -10.38 | -13.71 | -12.56  | -11.30  | -9.65  | 1.57  | -5.89  |
| 1458599_at    | 1458599_at    | 3.08                                                                             | 15.83  | 4.02   | 3.72    | 3.97    | 7.39   | 1.26  | 3.35   |
| 1438666_at    | 1700082C01Rik | 3.45                                                                             | 3.07   | 2.65   | 4.02    | 4.07    | 3.42   | -1.16 | -1.02  |
| 1424683_at    | 1810015C04Rik | 7.57                                                                             | 3.10   | 72.39  | 52.60   | 59.63   | 56.08  | -3.27 | 1.06   |
| 1450505_a_at  | 1810015C04Rik | 5.41                                                                             | 2.51   | 37.64  | 27.04   | 26.17   | 27.23  | 1.66  | 1.13   |
| 1433645_at    | 2210409B22Rik | -6.70                                                                            | -2.76  | -2.15  | -7.81   | -7.01   | -8.35  | 1.02  | -6.51  |
| 1452799_at    | 2310009E04Rik | 3.29                                                                             | 2.72   | 2.23   | 7.26    | 6.50    | 4.44   | 1.74  | 4.86   |
| 1429068_at    | 2810488G03Rik | -4.13                                                                            | -3.15  | -3.02  | -2.43   | -2.98   | -3.02  | -1.91 | -1.56  |
| 1429503_at    | 2900024C23Rik | 2.12                                                                             | 2.80   | 2.56   | 3.54    | 4.32    | 4.59   | 1.88  | 4.18   |
| 1439279_at    | 3110007F17Rik | 13.95                                                                            | 2.91   | 10.98  | 10.97   | 18.52   | 20.80  | 1.04  | 1.65   |
| 1452640_at    | 3110007F17Rik | 5.51                                                                             | 2.72   | 5.61   | 8.21    | 8.91    | 11.00  | -1.34 | -1.10  |
| 1428004_at    | 3300001G02Rik | 3.16                                                                             | 6.20   | 9.51   | 3.01    | 2.96    | 4.05   | -1.13 | -1.39  |
| 1452365_at    | 4732435N03Rik | 6.14                                                                             | 3.58   | 5.34   | 3.50    | 6.99    | 6.68   | 1.53  | 7.18   |
| 1452366_at    | 4732435N03Rik | 4.56                                                                             | 3.11   | 3.19   | 5.10    | 4.66    | 5.73   | 1.11  | 6.03   |
| 1433202_at    | 6030400A10Rik | -19.84                                                                           | -16.68 | -15.88 | -14.83  | -6.51   | -20.32 | -2.15 | -3.48  |
| 1433203_at    | 6030400A10Rik | -31.24                                                                           | -15.56 | -20.20 | -100.00 | -100.00 | -86.33 | -1.65 | -5.28  |
| 1443017_at    | 6030400A10Rik | -23.98                                                                           | -13.03 | -15.52 | -52.66  | -58.76  | -56.79 | -1.29 | -5.48  |
| 1458518_at    | 6030400A10Rik | -39.84                                                                           | -18.59 | -19.45 | -37.71  | -41.44  | -46.83 | -1.75 | -6.35  |
| 1434313_at    | 6330407D12Rik | -4.68                                                                            | -2.76  | -2.41  | -2.24   | -2.19   | -2.08  | -1.57 | -3.19  |
| 1457096_at    | 6430520M22Rik | -9.44                                                                            | -27.77 | -12.54 | -24.30  | -8.53   | -7.57  | -1.84 | -1.17  |
| 1441550_at    | 9330184L24Rik | 5.42                                                                             | 12.56  | 13.95  | 9.53    | 16.00   | 14.24  | -1.41 | 4.27   |
| 1429339_a_at  | Acad10        | -5.00                                                                            | -4.05  | -7.36  | -3.75   | -3.20   | -3.00  | 1.40  | -3.43  |
| 1448987_at    | Acadl         | -2.40                                                                            | -2.72  | -3.54  | -2.30   | -2.61   | -2.56  | -1.76 | -3.00  |
| 1431609_a_at  | Acp5          | -2.37                                                                            | -4.95  | -7.18  | -19.45  | -27.68  | -61.72 | 1.64  | -1.20  |



|              |               |        |        |        |         |        |        |       |       |
|--------------|---------------|--------|--------|--------|---------|--------|--------|-------|-------|
| 1438716_at   | AI451617      | -2.81  | -2.64  | -14.29 | -7.09   | -34.73 | -12.69 | -1.57 | -1.90 |
| 1417826_at   | Akr1e1        | 3.85   | 6.89   | 3.62   | 5.31    | 3.67   | 5.67   | 4.37  | 1.29  |
| 1452124_at   | Ank3          | -9.05  | -3.02  | -9.21  | -8.78   | -5.21  | -9.72  | -6.19 | 1.58  |
| 1424176_a_at | Anxa4         | 8.05   | 2.74   | 7.75   | 6.15    | 7.32   | 6.87   | 1.41  | 2.61  |
| 1447184_at   | AU021760      | 3.01   | 5.08   | 6.02   | 13.36   | 19.77  | 10.96  | 2.66  | -2.25 |
| 1416824_at   | B230118H07Rik | 2.62   | 2.21   | 5.64   | 10.05   | 8.90   | 7.40   | 1.29  | -2.35 |
| 1442019_at   | B230343A10Rik | 3.23   | 5.23   | 6.04   | 4.28    | 4.79   | 5.32   | 5.07  | 1.96  |
| 1459455_at   | B930007L02Rik | -2.59  | -4.63  | -5.52  | -4.77   | -6.08  | -5.27  | -2.18 | -1.14 |
| 1419406_a_at | Bcl11a        | 2.85   | 3.09   | 4.25   | 3.22    | 2.85   | 3.75   | -1.27 | 1.50  |
| 1456632_at   | Bcl11a        | 3.01   | 2.27   | 3.41   | 2.18    | 2.13   | 2.23   | -1.41 | 2.26  |
| 1428490_at   | C1galt1       | -2.57  | -2.46  | -2.63  | -4.55   | -5.17  | -3.96  | -1.27 | -1.51 |
| 1453957_a_at | C78205        | 10.02  | 9.23   | 20.58  | 29.66   | 31.22  | 42.75  | 12.11 | 1.52  |
| 1448676_at   | Camk2b        | 3.87   | 7.15   | 4.47   | 16.85   | 19.38  | 18.89  | 1.64  | -1.08 |
| 1457816_at   | Casp9         | -3.41  | -3.26  | -2.94  | -5.51   | -2.23  | -5.55  | -1.94 | -3.98 |
| 1448626_at   | Cdk5rap1      | -3.63  | -3.73  | -3.78  | -2.86   | -2.88  | -3.16  | -5.18 | 1.38  |
| 1420441_at   | Cenpc1        | -2.14  | -2.48  | -2.56  | -4.25   | -3.18  | -2.79  | -1.23 | -1.60 |
| 1442262_at   | Ches1         | -8.26  | -7.02  | -10.00 | -8.52   | -7.93  | -9.11  | -1.32 | -1.61 |
| 1425856_at   | Cib1          | 3.04   | 2.62   | 11.90  | 5.75    | 4.75   | 4.93   | 1.66  | 1.86  |
| 1421267_a_at | Cited2        | -2.97  | -5.63  | -3.45  | -5.92   | -7.38  | -5.55  | 1.20  | -1.09 |
| 1452207_at   | Cited2        | -2.16  | -2.79  | -2.64  | -3.43   | -4.79  | -4.34  | 1.47  | 1.13  |
| 1419693_at   | Colec12       | 24.00  | 2.50   | 62.71  | 3.11    | 5.10   | 5.43   | 1.49  | -1.14 |
| 1434272_at   | Cpeb2         | -20.03 | -13.06 | -13.10 | -100.00 | -54.33 | -49.65 | -1.75 | -3.87 |
| 1454653_at   | Cpne9         | -4.34  | -5.58  | -6.19  | -5.16   | -8.41  | -3.14  | -1.22 | -1.20 |
| 1438156_x_at | Cpt1a         | -3.42  | -2.07  | -3.67  | -4.55   | -3.67  | -3.19  | -1.02 | -1.14 |
| 1460409_at   | Cpt1a         | -3.39  | -2.19  | -3.31  | -3.78   | -2.61  | -2.60  | 1.60  | 1.02  |
| 1426951_at   | Crim1         | 9.62   | 19.91  | 35.20  | 46.49   | 56.49  | 47.10  | 7.60  | -2.01 |
| 1452253_at   | Crim1         | 11.44  | 16.46  | 27.94  | 32.22   | 37.37  | 31.67  | 7.99  | 1.13  |
| 1458497_at   | Crim1         | 2.89   | 5.15   | 5.40   | 8.13    | 7.72   | 5.59   | 1.45  | 1.04  |
| 1459632_at   | Crim1         | 15.04  | 11.60  | 29.40  | 41.78   | 52.85  | 35.20  | 5.83  | 1.09  |
| 1420731_a_at | Csrp2         | 5.13   | 4.99   | 4.10   | 3.52    | 3.07   | 3.31   | 1.64  | 2.70  |
| 1451447_at   | Cuedc1        | -3.88  | -3.48  | -4.16  | -10.13  | -12.43 | -7.56  | 1.94  | -5.94 |
| 1422978_at   | Cybb          | 12.21  | 9.84   | 24.32  | 7.60    | 7.46   | 10.08  | 10.31 | -1.81 |
| 1436778_at   | Cybb          | 10.55  | 7.51   | 18.55  | 5.72    | 6.47   | 7.99   | 7.83  | -1.95 |
| 1436779_at   | Cybb          | 16.76  | 9.05   | 31.92  | 7.48    | 10.04  | 12.15  | 14.53 | -1.27 |
| 1424677_at   | Cyp2j9        | 21.19  | 7.29   | 8.17   | 16.51   | 25.24  | 25.71  | 1.05  | 1.14  |

|              |               |        |        |        |        |         |        |       |        |
|--------------|---------------|--------|--------|--------|--------|---------|--------|-------|--------|
| 1428738_a_at | D14Ertd449e   | -2.17  | -3.71  | -4.58  | -3.25  | -3.30   | -2.26  | -1.92 | -2.26  |
| 1417821_at   | D17H6S56E-5   | 3.05   | 2.48   | 4.45   | 2.20   | 2.04    | 2.06   | 1.32  | -1.29  |
| 1437840_s_at | D2hgdh        | -2.55  | -2.96  | -2.93  | -4.16  | -5.41   | -3.38  | -3.38 | -1.96  |
| 1455118_at   | D9Ertd402e    | 4.38   | 5.58   | 4.04   | 5.34   | 4.61    | 5.26   | 1.42  | 2.64   |
| 1425315_at   | Dock7         | 27.28  | 11.71  | 7.04   | 14.65  | 25.63   | 21.62  | 7.24  | -1.14  |
| 1440615_at   | Dusp16        | 4.60   | 2.73   | 4.32   | 3.89   | 5.07    | 5.84   | -1.17 | -1.10  |
| 1436372_a_at | E530001F21Rik | -2.07  | -2.59  | -2.59  | -3.17  | -3.72   | -2.94  | -1.53 | -3.01  |
| 1423326_at   | Entpd1        | -2.13  | -4.16  | -2.85  | -3.21  | -3.00   | -3.25  | 1.24  | -2.21  |
| 1450939_at   | Entpd1        | -2.54  | -14.62 | -3.35  | -4.09  | -3.53   | -3.77  | 1.22  | -1.98  |
| 1453586_at   | Entpd1        | -3.88  | -22.42 | -6.48  | -4.94  | -3.67   | -2.10  | 1.44  | -2.72  |
| 1424324_at   | Esco1         | -3.78  | -3.25  | -4.26  | -4.01  | -5.04   | -3.66  | -1.86 | -3.29  |
| 1416236_a_at | Eva1          | -13.58 | -40.73 | -34.86 | -35.82 | -60.29  | -57.21 | 5.15  | 2.82   |
| 1416237_at   | Eva1          | -11.67 | -10.93 | -8.63  | -8.13  | -9.52   | -11.01 | 5.83  | 1.83   |
| 1448265_x_at | Eva1          | -16.44 | -40.89 | -35.07 | -38.58 | -44.04  | -42.40 | 5.11  | 2.41   |
| 1457424_at   | Eya1          | -9.67  | -32.70 | -12.79 | -25.86 | -22.68  | -33.51 | 2.54  | -34.56 |
| 1422327_s_at | G6pd2         | -2.05  | -2.04  | -2.12  | -2.58  | -2.21   | -2.16  | -1.59 | -4.79  |
| 1452452_at   | gag           | -17.80 | -16.35 | -13.00 | -16.78 | -22.00  | -19.77 | -1.12 | -1.36  |
| 1415698_at   | Golph2        | 3.58   | 2.40   | 6.08   | 6.56   | 7.17    | 9.26   | 1.15  | 2.32   |
| 1425477_x_at | H2-Ab1        | -8.53  | -31.95 | -27.16 | -31.15 | -35.88  | -32.71 | -1.20 | -3.83  |
| 1450648_s_at | H2-Ab1        | -6.00  | -38.21 | -9.59  | -61.17 | -100.00 | -98.18 | 1.17  | -2.34  |
| 1451721_a_at | H2-Ab1        | -4.82  | -13.73 | -8.20  | -38.19 | -21.33  | -42.48 | 1.48  | -3.01  |
| 1421358_at   | H2-M3         | -2.34  | -2.29  | -2.63  | -2.94  | -2.85   | -2.85  | 1.35  | 1.08   |
| 1438018_at   | Hook1         | 11.45  | 5.60   | 17.90  | 22.06  | 23.09   | 24.11  | -1.09 | 6.69   |
| 1439173_at   | Hook1         | 4.27   | 2.71   | 6.28   | 7.69   | 7.83    | 9.74   | 1.17  | 2.86   |
| 1419286_s_at | Ift81         | 5.29   | 3.67   | 5.39   | 18.35  | 28.06   | 33.89  | 2.83  | -1.07  |
| 1422610_s_at | Igf2bp3       | 6.63   | 4.90   | 12.77  | 22.96  | 25.68   | 27.00  | 8.82  | 1.05   |
| 1452843_at   | Il6st         | 10.77  | 11.38  | 2.67   | 10.09  | 13.62   | 10.91  | 1.46  | 1.29   |
| 1421670_a_at | Irak4         | -13.27 | -4.05  | -6.22  | -4.59  | -3.40   | -4.20  | -1.66 | -2.11  |
| 1417409_at   | Jun           | 3.98   | 2.31   | 3.90   | 6.95   | 6.26    | 5.24   | -1.45 | -1.67  |
| 1435342_at   | Kcnk6         | 3.04   | 3.22   | 2.71   | 5.39   | 5.81    | 5.72   | 2.57  | -1.45  |
| 1429063_s_at | Kif16b        | 3.43   | 3.93   | 3.11   | 3.18   | 3.85    | 4.72   | 2.91  | -5.52  |
| 1419826_at   | Kif17         | 8.12   | 8.80   | 3.44   | 12.43  | 14.24   | 12.40  | -1.30 | 2.12   |
| 1419827_s_at | Kif17         | 5.22   | 6.88   | 4.06   | 12.02  | 12.86   | 11.15  | 1.68  | 1.80   |
| 1422762_at   | Kif17         | 3.32   | 3.91   | 3.19   | 7.48   | 8.17    | 6.53   | 1.24  | 1.65   |
| 1418429_at   | Kif5b         | -2.29  | -2.03  | -2.92  | -3.19  | -2.30   | -2.79  | -2.27 | -1.86  |

|              |           |        |         |        |         |         |         |       |        |
|--------------|-----------|--------|---------|--------|---------|---------|---------|-------|--------|
| 1444003_at   | Lincr     | 22.48  | 10.84   | 51.24  | 7.03    | 6.88    | 3.27    | 6.34  | -2.13  |
| 1451962_at   | LOC213481 | -2.99  | -6.22   | -4.43  | -6.11   | -6.63   | -6.85   | 1.57  | -3.15  |
| 1442213_at   | LOC552908 | 18.45  | 5.50    | 14.46  | 14.74   | 23.38   | 22.29   | 1.57  | 1.53   |
| 1436107_at   | Lsm8      | -9.43  | -11.90  | -6.77  | -14.54  | -8.76   | -13.42  | -1.87 | -1.37  |
| 1419135_at   | Ltb       | 2.66   | 4.19    | 6.09   | 3.99    | 3.46    | 2.26    | -9.54 | -22.62 |
| 1419208_at   | Map3k8    | 5.59   | 5.56    | 5.93   | 5.11    | 4.45    | 3.60    | -1.00 | 2.65   |
| 1435358_at   | Mrps23    | -2.58  | -2.71   | -3.49  | -3.93   | -8.03   | -6.93   | 1.21  | -6.25  |
| 1424433_at   | Msrb2     | 4.36   | 3.35    | 2.96   | 5.56    | 5.82    | 7.08    | 3.59  | -3.85  |
| 1449981_a_at | Nat2      | 3.36   | 4.53    | 4.06   | 3.59    | 3.59    | 3.99    | 1.92  | 1.83   |
| 1436363_a_at | Nfix      | 10.55  | 4.44    | 9.49   | 17.89   | 19.69   | 17.38   | 1.82  | 1.46   |
| 1436364_x_at | Nfix      | 5.42   | 3.10    | 5.04   | 11.83   | 11.26   | 15.25   | 1.82  | 1.48   |
| 1420983_at   | Pctp      | -3.78  | -5.76   | -4.28  | -15.32  | -13.51  | -6.89   | -1.26 | -2.48  |
| 1416712_at   | Pepd      | 17.20  | 8.92    | 11.85  | 14.19   | 11.54   | 12.11   | -2.07 | -3.35  |
| 1453179_at   | Phca      | 2.09   | 4.78    | 4.51   | 7.37    | 7.77    | 9.19    | 1.74  | 1.36   |
| 1422743_at   | Phka1     | -3.35  | -6.03   | -7.90  | -87.10  | -100.00 | -100.00 | 2.34  | -3.31  |
| 1435567_at   | Phka1     | -3.86  | -7.48   | -6.60  | -100.00 | -100.00 | -100.00 | 2.47  | -3.24  |
| 1435872_at   | Pim1      | -5.22  | -8.77   | -3.33  | -10.27  | -10.01  | -7.95   | 2.58  | 1.77   |
| 1441870_s_at | Pkd2      | 8.89   | 4.92    | 6.30   | 3.13    | 4.27    | 4.50    | 1.03  | 1.80   |
| 1458764_at   | Pla2g1b   | -4.31  | -5.33   | -2.15  | -5.05   | -5.93   | -4.81   | -1.90 | -2.71  |
| 1424284_at   | Pomt1     | -6.87  | -4.33   | -3.55  | -6.71   | -7.36   | -5.06   | 1.64  | -4.48  |
| 1420831_at   | Qscn6     | 2.18   | 3.09    | 2.27   | 3.28    | 3.17    | 3.40    | 2.26  | 1.30   |
| 1437762_at   | Rab39     | 5.17   | 4.26    | 7.17   | 2.90    | 2.08    | 3.63    | 4.43  | 1.40   |
| 1454953_at   | Rnf157    | -2.25  | -4.60   | -2.20  | -2.40   | -4.74   | -3.11   | -1.71 | -2.62  |
| 1419480_at   | Sell      | 12.29  | 8.74    | 14.87  | 19.35   | 20.95   | 20.61   | -3.76 | -2.15  |
| 1419481_at   | Sell      | 9.59   | 7.48    | 13.01  | 16.53   | 16.11   | 16.98   | -8.13 | -2.19  |
| 1436100_at   | Sh2d5     | 4.02   | 4.41    | 2.56   | 6.02    | 7.78    | 6.75    | -1.23 | 3.59   |
| 1439434_x_at | Sh2d5     | 5.04   | 8.67    | 3.57   | 8.31    | 9.28    | 11.00   | 1.09  | 5.51   |
| 1426323_x_at | Siva      | 9.72   | 10.83   | 2.09   | 6.62    | 9.14    | 14.21   | -1.93 | 3.60   |
| 1448568_a_at | Slc20a1   | 5.27   | 8.99    | 8.38   | 2.29    | 2.24    | 2.03    | 1.93  | 3.36   |
| 1423443_at   | Slc4a8    | -2.97  | -3.27   | -3.33  | -4.31   | -3.60   | -3.95   | -1.02 | -1.90  |
| 1427049_s_at | Smo       | 12.07  | 7.30    | 4.28   | 5.43    | 6.20    | 8.89    | 1.32  | 1.13   |
| 1417644_at   | Sspn      | -30.04 | -100.00 | -84.90 | -100.00 | -100.00 | -71.21  | 1.42  | -4.70  |
| 1417645_at   | Sspn      | -40.56 | -53.16  | -54.49 | -50.37  | -57.08  | -39.55  | -1.24 | -9.84  |
| 1435302_at   | Taf4b     | -9.59  | -3.50   | -2.28  | -4.25   | -8.32   | -4.50   | 1.04  | -3.36  |
| 1428425_at   | Tgfbrap1  | -2.74  | -2.23   | -2.66  | -3.98   | -2.73   | -2.04   | -1.45 | -2.44  |

|              |          |        |       |         |         |         |        |       |       |
|--------------|----------|--------|-------|---------|---------|---------|--------|-------|-------|
| 1428426_s_at | Tgfbrap1 | -2.18  | -2.08 | -2.70   | -2.46   | -3.34   | -2.21  | -1.23 | -2.27 |
| 1448529_at   | Thbd     | 2.40   | 2.36  | 2.68    | 4.13    | 3.69    | 4.14   | -2.05 | 6.05  |
| 1436212_at   | Tmem71   | 2.42   | 2.19  | 2.32    | 2.07    | 2.02    | 2.42   | 1.39  | 2.29  |
| 1459568_at   | Tmtc4    | -2.51  | -4.51 | -4.01   | -3.02   | -2.50   | -2.34  | -1.87 | 1.23  |
| 1448297_a_at | Tnk2     | -2.02  | -2.08 | -2.32   | -2.40   | -3.55   | -2.26  | -1.23 | -1.22 |
| 1455124_at   | Trim68   | 5.23   | 5.37  | 6.72    | 4.48    | 5.32    | 4.29   | 2.86  | 1.47  |
| 1443153_at   | Trip11   | -12.77 | -5.54 | -11.02  | -6.02   | -6.18   | -9.30  | -1.19 | 1.08  |
| 1451230_a_at | Wbp5     | -2.41  | -2.15 | -100.00 | -100.00 | -100.00 | -80.07 | -1.11 | -1.81 |
| 1446820_at   | Zfp182   | 11.27  | 12.80 | 18.76   | 18.99   | 20.49   | 16.49  | -1.02 | 15.63 |
| 1456504_at   | Zfp182   | 23.95  | 26.45 | 27.23   | 29.50   | 42.37   | 38.34  | -1.10 | 26.47 |
| 1459712_at   | Zfp182   | 13.41  | 11.68 | 17.35   | 20.84   | 21.56   | 22.23  | 1.17  | 18.40 |
| 1428564_at   | Zfp579   | 3.21   | 3.05  | 4.45    | 5.55    | 4.92    | 4.92   | 1.74  | -2.32 |

\*Fold change from experinents using the Affymetrix Mouse Genome 430, v2.0 GeneChip® arrays

**Supplementary Table 3. Genes that are significantly differentially regulated in response to Rag DSBs that are dependent on Atm and NFκB**

|               |               | Relative fold change* for each sample / average of the RAG2 <sup>-/-</sup> samples |        |        |        |        |        |       |        |
|---------------|---------------|------------------------------------------------------------------------------------|--------|--------|--------|--------|--------|-------|--------|
| Affymetrix ID | Sequence Name | A.1                                                                                | A.2    | A.3    | A.3ΔN1 | A.3ΔN2 | A.3ΔN3 | AA.1  | AA.2   |
| 1433936_at    | 0610010E21Rik | 2.41                                                                               | 2.30   | 3.13   | 1.12   | 1.00   | -1.01  | -1.01 | -1.04  |
| 1431008_at    | 0610037M15Rik | 3.11                                                                               | 2.70   | 2.13   | -1.89  | -2.60  | -1.59  | 1.97  | 1.80   |
| 1420311_s_at  | 1420311_s_at  | -2.68                                                                              | -3.91  | -2.78  | -3.42  | -1.93  | -2.70  | -1.79 | -1.60  |
| 1420313_x_at  | 1420313_x_at  | -2.22                                                                              | -4.01  | -3.07  | -2.19  | -1.46  | -2.34  | -1.68 | -1.90  |
| 1441150_x_at  | 1441150_x_at  | 2.51                                                                               | 2.58   | 5.53   | 1.71   | 1.98   | 2.61   | 1.93  | 1.13   |
| 1442074_at    | 1442074_at    | 7.30                                                                               | 3.59   | 2.90   | -2.04  | -1.93  | -2.02  | -3.45 | 1.13   |
| 1442783_x_at  | 1442783_x_at  | 3.40                                                                               | 2.19   | 2.34   | 1.44   | 2.56   | 2.57   | 1.87  | 1.84   |
| 1443051_at    | 1443051_at    | 5.43                                                                               | 5.16   | 2.88   | 1.87   | 2.14   | 1.86   | -1.33 | 3.12   |
| 1445263_at    | 1445263_at    | -4.23                                                                              | -3.18  | -3.35  | -1.88  | -2.76  | -2.66  | 1.05  | 1.12   |
| 1445678_at    | 1445678_at    | 2.66                                                                               | 5.12   | 10.38  | 3.12   | 1.68   | 6.32   | -1.09 | 10.41  |
| 1423989_at    | 2210010N04Rik | -2.49                                                                              | -2.01  | -2.14  | 1.26   | 1.06   | -1.22  | -2.00 | -2.58  |
| 1459927_at    | 4833445I07Rik | 2.20                                                                               | 2.98   | 2.99   | -1.39  | -1.10  | -1.49  | 1.48  | -1.24  |
| 1434572_at    | 4921508M14Rik | -14.64                                                                             | -12.15 | -36.33 | -2.09  | -1.75  | -1.74  | -1.90 | -38.74 |
| 1444574_at    | 4930577N17Rik | 2.03                                                                               | 2.20   | 2.09   | 1.27   | 1.71   | 1.45   | 1.63  | 1.55   |
| 1455032_at    | 9630037P07Rik | -2.38                                                                              | -2.25  | -2.60  | -1.92  | -1.84  | -1.63  | -1.28 | -1.72  |
| 1427546_at    | Abca8b        | 8.80                                                                               | 10.42  | 3.69   | 1.07   | 2.08   | -1.33  | 7.68  | 1.31   |
| 1460078_at    | AI415467      | -4.04                                                                              | -3.35  | -3.82  | 1.42   | -1.86  | -3.64  | -1.57 | -1.04  |
| 1442018_at    | AI426953      | 2.58                                                                               | 2.22   | 2.21   | -2.21  | -1.45  | -1.11  | 1.37  | 1.54   |
| 1417294_at    | Akr7a5        | -2.05                                                                              | -2.23  | -2.53  | -1.89  | -2.29  | -2.53  | -1.55 | -1.44  |
| 1422807_at    | Arf5          | -2.50                                                                              | -2.66  | -3.13  | -2.17  | -2.19  | -1.74  | -1.26 | -1.61  |
| 1436074_at    | AY078069      | 6.05                                                                               | 4.43   | 6.89   | 1.20   | -1.53  | 1.13   | 1.76  | -1.41  |
| 1457072_at    | Bcl11a        | 2.91                                                                               | 2.21   | 3.29   | 1.82   | 2.37   | 2.37   | -1.28 | 2.46   |
| 1418133_at    | Bcl3          | 28.16                                                                              | 5.32   | 36.74  | 2.04   | -1.21  | 3.43   | 1.34  | -1.43  |
| 1444120_at    | Bin1          | -2.51                                                                              | -2.00  | -2.37  | 1.08   | 1.43   | -1.20  | -1.94 | -1.91  |
| 1451417_at    | Brca1         | -2.04                                                                              | -2.63  | -2.37  | -1.29  | -1.38  | -1.31  | 1.00  | 1.38   |
| 1419658_at    | C920025E04Rik | 12.49                                                                              | 5.91   | 7.85   | 1.91   | 1.73   | 3.60   | 1.97  | 3.10   |
| 1424633_at    | Camk1g        | 5.71                                                                               | 4.40   | 3.09   | -1.18  | 1.05   | 1.28   | 1.65  | 2.73   |
| 1429891_at    | Capsl         | 2.63                                                                               | 3.29   | 2.99   | -1.95  | -1.82  | -1.57  | 3.55  | 1.58   |
| 1426125_a_at  | Casp9         | -2.28                                                                              | -2.51  | -2.19  | -1.41  | -1.76  | -2.02  | -1.36 | -2.50  |

|              |               |       |       |       |       |       |       |        |       |
|--------------|---------------|-------|-------|-------|-------|-------|-------|--------|-------|
| 1439221_s_at | Cd40          | 5.82  | 2.53  | 22.48 | 2.09  | 1.64  | 1.15  | 1.62   | -1.36 |
| 1460218_at   | Cd52          | 2.42  | 2.61  | 4.75  | -1.03 | 1.07  | -1.07 | 1.29   | 1.14  |
| 1418762_at   | Cd55          | 2.97  | 3.74  | 3.38  | 1.43  | 1.61  | 2.14  | 1.02   | 1.81  |
| 1443906_at   | Cd55          | 2.75  | 3.24  | 2.65  | 1.40  | 1.39  | 1.25  | -1.22  | 1.72  |
| 1460242_at   | Cd55          | 2.46  | 3.30  | 3.57  | 1.45  | 1.63  | 1.81  | -1.36  | 1.82  |
| 1428735_at   | Cd69          | 2.47  | 2.10  | 3.95  | -1.25 | -1.46 | -1.39 | -1.21  | -1.69 |
| 1457952_at   | Cd80          | 12.01 | 9.07  | 2.24  | 1.72  | 1.72  | -1.52 | 1.72   | 1.67  |
| 1439352_at   | Cdk2ap1       | 13.73 | 11.45 | 4.43  | 1.19  | 1.03  | 1.46  | -1.84  | 1.88  |
| 1454268_a_at | Cyba          | 3.30  | 2.93  | 4.47  | 1.29  | 1.11  | 1.23  | -1.06  | -1.25 |
| 1417822_at   | D17H6S56E-5   | 2.75  | 2.09  | 3.67  | 1.97  | 1.85  | 1.91  | 1.21   | -1.30 |
| 1456111_at   | D930028F11Rik | 12.14 | 28.76 | 2.66  | 1.96  | 2.25  | -1.90 | 32.55  | -1.56 |
| 1419367_at   | Decr1         | 3.68  | 2.30  | 3.09  | 2.22  | 1.76  | 2.18  | -2.34  | -5.10 |
| 1437927_at   | Dlgh2         | -5.93 | -3.22 | -3.81 | -3.31 | -2.73 | -1.60 | 2.54   | -3.95 |
| 1448830_at   | Dusp1         | 7.33  | 4.86  | 4.12  | 2.41  | 2.39  | 1.67  | 3.12   | 1.88  |
| 1451218_at   | Edem1         | -2.51 | -2.03 | -2.16 | -1.78 | -1.89 | -1.67 | -1.17  | -1.62 |
| 1418773_at   | Fads3         | 2.73  | 2.92  | 2.47  | 2.94  | 2.20  | 1.21  | -1.00  | 2.35  |
| 1442305_at   | Gtpbp2        | -2.40 | -2.35 | -2.08 | -1.49 | -1.37 | -1.92 | -1.28  | -1.24 |
| 1451644_a_at | H2-Q1         | 3.85  | 3.31  | 2.23  | -2.66 | -1.77 | -1.58 | 1.90   | 1.84  |
| 1432026_a_at | Ids           | -3.04 | -2.57 | -3.12 | -2.34 | -1.73 | -2.09 | -1.10  | -1.87 |
| 1438037_at   | Ids           | -3.13 | -2.24 | -4.29 | -1.50 | -1.88 | -1.59 | -1.06  | -1.54 |
| 1417612_at   | Ier5          | 5.34  | 6.03  | 2.90  | 1.63  | 1.72  | 2.54  | -1.54  | 2.16  |
| 1417613_at   | Ier5          | 13.94 | 16.59 | 2.56  | 1.21  | 1.12  | 2.52  | -4.24  | 2.55  |
| 1460009_at   | Ier5          | 5.11  | 4.59  | 2.55  | -2.15 | -1.24 | 1.83  | -1.30  | 2.53  |
| 1451749_at   | Irak4         | -3.02 | -2.54 | -2.17 | -1.65 | -1.94 | -1.58 | -1.25  | -1.66 |
| 1433634_at   | Irf2bp2       | 2.81  | 3.19  | 2.16  | 1.48  | 1.58  | 1.37  | 1.57   | 1.34  |
| 1430597_at   | Jakmip1       | -2.04 | -2.53 | -3.08 | -1.63 | -1.91 | -1.35 | -1.37  | -2.32 |
| 1429062_at   | Kif16b        | 2.29  | 2.86  | 2.47  | 1.99  | 2.56  | 3.04  | 1.80   | -2.66 |
| 1416251_at   | Mcm6          | -3.63 | -3.51 | -3.21 | -1.24 | -1.58 | -1.45 | -1.69  | -3.19 |
| 1438852_x_at | Mcm6          | -2.94 | -2.63 | -2.78 | -1.91 | -1.61 | -1.55 | -1.65  | -2.00 |
| 1437250_at   | Mreg          | 2.63  | 2.45  | 2.75  | 1.18  | 1.36  | 1.88  | -2.85  | -5.14 |
| 1455736_at   | Mybpc2        | 4.79  | 3.72  | 2.01  | 1.21  | -1.26 | 1.86  | 1.19   | 3.14  |
| 1452740_at   | Myh10         | -6.88 | -3.79 | -4.64 | 2.45  | 1.92  | 2.31  | -12.08 | 2.22  |
| 1425902_a_at | Nfkb2         | 18.86 | 16.01 | 10.10 | 1.04  | -1.13 | -1.06 | 1.91   | 1.30  |
| 1431843_a_at | Nfkbie        | 3.87  | 3.00  | 3.98  | -1.30 | -1.16 | -1.31 | -1.05  | -1.23 |
| 1458299_s_at | Nfkbie        | 4.02  | 3.32  | 4.14  | -1.05 | -1.10 | -1.25 | -1.17  | -1.16 |

|              |         |       |       |       |       |       |       |       |       |
|--------------|---------|-------|-------|-------|-------|-------|-------|-------|-------|
| 1418633_at   | Notch1  | 2.54  | 3.03  | 2.78  | 1.68  | 1.20  | 1.38  | 1.10  | -2.01 |
| 1418634_at   | Notch1  | 2.23  | 2.47  | 2.54  | 1.54  | 1.25  | 1.03  | -1.05 | -2.47 |
| 1426657_s_at | Phgdh   | 4.02  | 2.80  | 3.04  | -1.57 | -1.33 | -1.12 | 2.45  | -1.48 |
| 1437621_x_at | Phgdh   | 3.22  | 2.21  | 2.38  | -1.68 | -1.62 | -1.27 | 1.74  | -1.61 |
| 1417216_at   | Pim2    | 3.70  | 5.89  | 9.08  | -1.44 | -2.50 | -2.42 | -1.64 | -8.23 |
| 1451698_at   | Psrc1   | 15.02 | 24.79 | 3.63  | 1.94  | 1.18  | 6.30  | -1.71 | 8.84  |
| 1422045_a_at | Ptpn12  | -2.08 | -2.45 | -2.03 | -1.41 | -1.65 | -1.46 | -1.00 | -1.08 |
| 1417856_at   | Relb    | 3.26  | 2.47  | 2.95  | -2.86 | -2.50 | -2.39 | -1.25 | -3.50 |
| 1449110_at   | Rhob    | 3.19  | 3.34  | 3.54  | -2.95 | -1.93 | 1.10  | -2.84 | -1.41 |
| 1423986_a_at | Scotin  | 4.49  | 4.74  | 9.13  | 2.02  | 1.75  | 1.59  | -1.11 | -2.02 |
| 1437503_a_at | Scotin  | 3.51  | 3.64  | 5.97  | 1.86  | 1.75  | 1.56  | -1.06 | -1.91 |
| 1423543_at   | Swap70  | 2.01  | 2.72  | 3.19  | 1.09  | 1.01  | 1.13  | 1.19  | -1.17 |
| 1434225_at   | Swap70  | 2.05  | 2.62  | 2.82  | 1.01  | -1.13 | -1.00 | 1.18  | -1.33 |
| 1417455_at   | Tgfb3   | -2.96 | -2.51 | -3.97 | 1.04  | -1.17 | -1.46 | 1.10  | 1.26  |
| 1458512_at   | Tle3    | -2.14 | -3.18 | -2.67 | -1.23 | -1.26 | -1.60 | -1.38 | -2.31 |
| 1454741_s_at | Tmem164 | -2.71 | -3.97 | -4.75 | -2.93 | -2.58 | -1.86 | -1.59 | -1.15 |
| 1428758_at   | Tmem86a | -3.11 | -2.03 | -2.10 | -1.32 | -1.53 | -1.48 | 1.17  | -3.10 |
| 1433699_at   | Tnfaip3 | 3.11  | 3.26  | 3.24  | 2.65  | 2.21  | 1.94  | 1.04  | 1.73  |
| 1450829_at   | Tnfaip3 | 3.01  | 3.84  | 2.15  | 2.04  | 1.82  | 1.78  | -1.30 | 1.69  |
| 1421398_at   | Trim7   | 14.90 | 8.02  | 6.20  | 2.93  | 1.12  | 3.06  | 1.42  | 2.16  |
| 1448472_at   | Vars2   | 2.54  | 2.21  | 2.36  | 1.61  | 1.50  | 1.56  | -1.35 | -2.35 |
| 1420909_at   | Vegfa   | -3.97 | -2.17 | -4.76 | -2.36 | -2.08 | -1.79 | -1.36 | -9.19 |
| 1439060_s_at | Wipi1   | 2.28  | 2.48  | 2.05  | 1.20  | 1.35  | 1.42  | 1.49  | -1.02 |

\*Fold change from experiments using the Affymetrix Mouse Genome 430, v2.0 GeneChip® arrays

**Supplementary Table 4. Subset of genes from Supplementary Tables 1-3 that are also significantly regulated in primary pre-B cells in response to Rag DSBs**

| Relative fold change* for each<br>Artemis-/-:IgHtg sample/average of the<br>RAG1-/-:IgHtg samples |                      |                            |                            |                                            |  |
|---------------------------------------------------------------------------------------------------|----------------------|----------------------------|----------------------------|--------------------------------------------|--|
| <b>Affymetrix ID</b>                                                                              | <b>Sequence Name</b> | <b>Artemis-/-:IgHtg #1</b> | <b>Artemis-/-:IgHtg #2</b> | <b>average of fold change in #1 and #2</b> |  |
| 1433936_at                                                                                        | 0610010E21Rik        | 1.58                       | 1.55                       | 1.6                                        |  |
| 1455219_at                                                                                        | 1110030E23Rik        | -2.90                      | -1.71                      | -2.3                                       |  |
| 1452418_at                                                                                        | 1200016E24Rik        | 1.42                       | 1.71                       | 1.6                                        |  |
| 1455869_at                                                                                        | 1300007C21Rik        | 2.16                       | 1.74                       | 1.9                                        |  |
| 1441971_at                                                                                        | 1441971_at           | 2.40                       | 4.10                       | 3.3                                        |  |
| 1442074_at                                                                                        | 1442074_at           | 5.15                       | 6.72                       | 5.9                                        |  |
| 1443051_at                                                                                        | 1443051_at           | 1.53                       | 1.41                       | 1.5                                        |  |
| 1444937_at                                                                                        | 1444937_at           | -2.26                      | -2.22                      | -2.2                                       |  |
| 1445263_at                                                                                        | 1445263_at           | 1.72                       | 1.21                       | 1.5                                        |  |
| 1445641_at                                                                                        | 1445641_at           | 2.08                       | 1.63                       | 1.9                                        |  |
| 1458599_at                                                                                        | 1458599_at           | 2.95                       | 10.58                      | 6.8                                        |  |
| 1440640_at                                                                                        | 2010111I01Rik        | -2.41                      | -1.05                      | -1.7                                       |  |
| 1436679_at                                                                                        | 2210010N04Rik        | -2.69                      | -1.46                      | -2.1                                       |  |
| 1452799_at                                                                                        | 2310009E04Rik        | 1.84                       | 2.36                       | 2.1                                        |  |
| 1431141_at                                                                                        | 2610507I01Rik        | -4.04                      | 1.07                       | -1.5                                       |  |
| 1454158_at                                                                                        | 2810038M04Rik        | -2.21                      | -2.33                      | -2.3                                       |  |
| 1429503_at                                                                                        | 2900024C23Rik        | 1.93                       | 1.95                       | 1.9                                        |  |
| 1431478_at                                                                                        | 3110035G12Rik        | -1.23                      | -1.70                      | -1.5                                       |  |
| 1428004_at                                                                                        | 3300001G02Rik        | 2.22                       | 2.17                       | 2.2                                        |  |
| 1419730_at                                                                                        | 4631427C17Rik        | 2.02                       | 2.21                       | 2.1                                        |  |
| 1459927_at                                                                                        | 4833445I07Rik        | 1.73                       | 1.57                       | 1.7                                        |  |
| 1433202_at                                                                                        | 6030400A10Rik        | -2.52                      | -2.14                      | -2.3                                       |  |
| 1421840_at                                                                                        | Abca1                | -1.54                      | -1.76                      | -1.6                                       |  |
| 1427546_at                                                                                        | Abca8b               | -1.90                      | -1.02                      | -1.5                                       |  |
| 1424176_a_at                                                                                      | Anxa4                | 2.04                       | 2.28                       | 2.2                                        |  |
| 1421466_at                                                                                        | Asb10                | -1.81                      | -3.40                      | -2.6                                       |  |
| 1436074_at                                                                                        | AY078069             | 2.11                       | 1.89                       | 2.0                                        |  |



|              |               |       |       |      |
|--------------|---------------|-------|-------|------|
| 1416824_at   | B230118H07Rik | 2.25  | 2.14  | 2.2  |
| 1442019_at   | B230343A10Rik | 4.73  | 1.17  | 2.9  |
| 1440171_x_at | BB026409      | -1.96 | -1.17 | -1.6 |
| 1419406_a_at | Bcl11a        | 2.32  | 2.59  | 2.5  |
| 1456632_at   | Bcl11a        | 1.75  | 2.47  | 2.1  |
| 1457072_at   | Bcl11a        | 1.69  | 2.15  | 1.9  |
| 1418133_at   | Bcl3          | 4.11  | 3.65  | 3.9  |
| 1429048_at   | Bloc1s2       | 1.79  | 1.83  | 1.8  |
| 1451417_at   | Brca1         | -1.51 | -1.50 | -1.5 |
| 1445510_at   | C79601        | 1.60  | 1.48  | 1.5  |
| 1457769_at   | C920009B18Rik | 1.18  | 1.74  | 1.5  |
| 1424633_at   | Camk1g        | -1.31 | -1.60 | -1.5 |
| 1441974_at   | Camk4         | 1.02  | 1.89  | 1.5  |
| 1417420_at   | Ccnd1         | 3.14  | 5.98  | 4.6  |
| 1424727_at   | Ccr5          | 2.70  | 2.55  | 2.6  |
| 1426120_a_at | Cd244         | 5.25  | 2.98  | 4.1  |
| 1449991_at   | Cd244         | 2.22  | 2.00  | 2.1  |
| 1439221_s_at | Cd40          | 9.52  | 6.08  | 7.8  |
| 1460218_at   | Cd52          | 1.70  | 1.78  | 1.7  |
| 1428735_at   | Cd69          | 1.96  | 1.29  | 1.6  |
| 1444416_at   | Cenpa         | -1.46 | -1.93 | -1.7 |
| 1419693_at   | Colec12       | 1.43  | 2.17  | 1.8  |
| 1459632_at   | Crim1         | 1.64  | 1.65  | 1.6  |
| 1454268_a_at | Cyba          | 1.75  | 2.10  | 1.9  |
| 1422978_at   | Cybb          | 5.39  | 5.27  | 5.3  |
| 1436778_at   | Cybb          | 3.37  | 4.21  | 3.8  |
| 1436779_at   | Cybb          | 2.65  | 3.20  | 2.9  |
| 1442656_at   | D3Ert343e     | 3.82  | 1.62  | 2.7  |
| 1456111_at   | D930028F11Rik | 1.35  | 2.50  | 1.9  |
| 1425315_at   | Dock7         | 2.02  | 2.03  | 2.0  |
| 1417235_at   | Ehd3          | 1.54  | 2.69  | 2.1  |
| 1418773_at   | Fads3         | 3.79  | 6.36  | 5.1  |
| 1443621_at   | Fbxo39        | 7.71  | 1.05  | 4.4  |
| 1460434_at   | Fundc2        | -3.61 | -3.18 | -3.4 |
| 1426704_at   | Gak           | 3.06  | 1.88  | 2.5  |

|              |              |       |       |      |
|--------------|--------------|-------|-------|------|
| 1455599_at   | Gfod1        | -1.92 | -1.36 | -1.6 |
| 1415698_at   | Golm1        | 1.65  | 1.39  | 1.5  |
| 1423689_a_at | Gpsm1        | -1.74 | -1.28 | -1.5 |
| 1451593_at   | H2-D1        | -2.27 | -1.15 | -1.7 |
| 1450582_at   | H2-Q5        | -2.43 | -1.76 | -2.1 |
| 1440145_at   | H60          | -1.69 | -1.23 | -1.5 |
| 1434572_at   | Hdac9        | -2.46 | -2.59 | -2.5 |
| 1417613_at   | Ier5         | 7.93  | 9.22  | 8.6  |
| 1417612_at   | Ier5         | 2.89  | 2.49  | 2.7  |
| 1460009_at   | Ier5         | 2.40  | 2.74  | 2.6  |
| 1452843_at   | Il6st        | 2.42  | 2.65  | 2.5  |
| 1426214_at   | Imp4         | -2.01 | -1.07 | -1.5 |
| 1430597_at   | Jakmip1      | -1.12 | -1.83 | -1.5 |
| 1433815_at   | Jakmip1      | -1.82 | -1.98 | -1.9 |
| 1441071_at   | Kcnq5        | -1.77 | -3.87 | -2.8 |
| 1438666_at   | Ldlrad3      | 1.46  | 1.52  | 1.5  |
| 1439651_at   | Lmo4         | -1.81 | -2.18 | -2.0 |
| 1441150_x_at | LOC100039236 | 1.69  | 2.16  | 1.9  |
| 1451962_at   | LOC213481    | -1.62 | -1.45 | -1.5 |
| 1431213_a_at | LOC67527     | 2.53  | 1.82  | 2.2  |
| 1419135_at   | Ltb          | 2.60  | 2.58  | 2.6  |
| 1418936_at   | Maff         | 1.03  | 3.74  | 2.4  |
| 1419208_at   | Map3k8       | 3.49  | 3.74  | 3.6  |
| 1451799_at   | MGC38132     | 3.13  | 1.39  | 2.3  |
| 1425902_a_at | Nfkb2        | 3.85  | 2.38  | 3.1  |
| 1458299_s_at | Nfkbie       | 3.21  | 2.63  | 2.9  |
| 1431843_a_at | Nfkbie       | 3.30  | 2.31  | 2.8  |
| 1418634_at   | Notch1       | 1.74  | 2.11  | 1.9  |
| 1458318_at   | Oxr1         | -9.80 | -2.45 | -6.1 |
| 1416712_at   | Pepd         | 1.68  | 2.02  | 1.9  |
| 1438435_at   | Phca         | 1.91  | 1.99  | 2.0  |
| 1435567_at   | Phka1        | -1.52 | -1.41 | -1.5 |
| 1422743_at   | Phka1        | -1.50 | -1.66 | -1.6 |
| 1433462_a_at | Pi4k2a       | -1.86 | -1.53 | -1.7 |
| 1417216_at   | Pim2         | 2.74  | 2.23  | 2.5  |

|              |         |       |       |      |
|--------------|---------|-------|-------|------|
| 1458764_at   | Pla2g1b | -1.81 | -1.39 | -1.6 |
| 1436194_at   | Prelid2 | 2.00  | 1.28  | 1.6  |
| 1422045_a_at | Ptpn12  | -2.56 | -2.09 | -2.3 |
| 1416527_at   | Rab32   | 1.96  | 1.65  | 1.8  |
| 1417856_at   | Relb    | 1.63  | 1.88  | 1.8  |
| 1423515_at   | Scn8a   | -1.35 | -1.64 | -1.5 |
| 1423986_a_at | Scotin  | 2.34  | 2.13  | 2.2  |
| 1437503_a_at | Scotin  | 1.61  | 1.83  | 1.7  |
| 1419481_at   | Sell    | 2.41  | 2.37  | 2.4  |
| 1419480_at   | Sell    | 1.88  | 2.50  | 2.2  |
| 1419668_at   | Sgcb    | 1.70  | 2.20  | 1.9  |
| 1419667_at   | Sgcb    | 1.32  | 2.54  | 1.9  |
| 1417584_at   | Slc11a2 | -1.92 | -1.13 | -1.5 |
| 1452078_a_at | Slc11a2 | -2.39 | -1.63 | -2.0 |
| 1439494_at   | Slc5a9  | 1.40  | 2.22  | 1.8  |
| 1426634_at   | Slc5a9  | 1.55  | 2.03  | 1.8  |
| 1435603_at   | Sned1   | 1.50  | 4.55  | 3.0  |
| 1438543_at   | Spata13 | -2.94 | -1.00 | -2.0 |
| 1417645_at   | Sspn    | -1.49 | -2.12 | -1.8 |
| 1423543_at   | Swap70  | 2.10  | 1.72  | 1.9  |
| 1434225_at   | Swap70  | 1.80  | 1.43  | 1.6  |
| 1458512_at   | Tle3    | 1.16  | 1.78  | 1.5  |
| 1454741_s_at | Tmem164 | -2.21 | -1.83 | -2.0 |
| 1450829_at   | Tnfaip3 | 3.49  | 2.31  | 2.9  |
| 1433699_at   | Tnfaip3 | 2.55  | 2.49  | 2.5  |
| 1439352_at   | Trim7   | 5.15  | 3.19  | 4.2  |
| 1421398_at   | Trim7   | 1.78  | 2.28  | 2.0  |
| 1446905_at   | Waspip  | -1.25 | -2.22 | -1.7 |
| 1440400_at   | X83325  | 1.80  | 1.55  | 1.7  |
| 1431747_at   | Zw10    | -2.00 | -2.42 | -2.2 |

---

\*Fold change from experiments using the Affymetrix Mouse Genome 430, v2.0 GeneChip® arrays
